# Supplementary material
Source: MDPI journal article supplement (https://www.mdpi.com/2227-7102/13/3/238)
Supplement: s1 [file s1]

**Table S3** – Models, strategies and methods of teaching methodologies of the included studies.

| Reference             | Group | Model *               | Strategy                                                          | Method †                                                                                                                                                                                                    |
|-----------------------|-------|-----------------------|-------------------------------------------------------------------|-------------------------------------------------------------------------------------------------------------------------------------------------------------------------------------------------------------|
| Adiga et al., 2011    | CBL   | Constructivist        | Indirect Instruction (active, discussion-based)                   | Cases (introduction to case + video of clinical cases + discussion of the case)                                                                                                                             |
|                       | DL    | Behaviorist           | Direct Instruction (passive, information transfer)                | Lectures                                                                                                                                                                                                    |
| Ahmad et al., 2017    | CBL   | Constructivist        | Indirect Instruction (active, discussion-based)                   | Cases (small group teaching, problem-based sessions, clinical skills lab, and early clinical exposure)                                                                                                      |
|                       | DL    | Behaviorist           | Direct Instruction (passive, information transfer)                | Lectures (subject-based)                                                                                                                                                                                    |
| Alimoglu et al., 2014 | CBL   | Constructivist        | Indirect Instruction (active, discussion-based)                   | Cases (90 min class that was heavily patient problem-oriented and the main pedagogy was problem solving: (1) instructive slides for background and (2) group-based discussion of a case + teacher feedback) |
|                       | DL    | Behaviorist           | Direct Instruction (passive, information transfer)                | Lectures (large classrooms: 2 sessions of 90 min using PowerPoint slides; small classrooms: 3 sessions of 105 min using PowerPoint slides and drawing on the board)                                         |
|                       | PBL   | Constructivist        | Indirect Instruction (active, discussion-based + problem-solving) | PBL (7h, with written scenario simulating the real-life patient problems and patient details were disclosed progressively and then discussed in groups with guidance from the tutor)                        |
| Bhardwaj et al., 2015 | CBL   | Constructivist        | Indirect Instruction (active, discussion-based)                   | Cases (1h lectures + case-stimulated sessions + clinical visits + laboratory work + small group student's seminar.)                                                                                         |
|                       | DL    | Behaviorist           | Direct Instruction (passive, information transfer)                | Lectures                                                                                                                                                                                                    |
| Carrasco et al., 2018 | CBL   | Constructivist        | Indirect Instruction (active, discussion-based)                   | Cases (3x/week for 2h each session, self-directed learning time + clinical cases discussion)                                                                                                                |
|                       | TBL   | Social constructivist | Interactive Instruction (active + collaborative learning)         | Individual work followed by team work (lectures + iRAT + gRAT + two open-book application questions)                                                                                                        |
| Cendan et al., 2011   | CBL   | Constructivist        | Indirect Instruction (active, discussion-based)                   | Cases (8 sessions of 2h small group case-based discussion + 9 sessions of 1h lectures in video format)                                                                                                      |
|                       | DL    | Behaviorist           | Direct Instruction (passive, information transfer)                | Lectures                                                                                                                                                                                                    |

|                      |                      |                |                                                                     |                                                                                                                                      |
|----------------------|----------------------|----------------|---------------------------------------------------------------------|--------------------------------------------------------------------------------------------------------------------------------------|
| Chengyi et al., 2017 | PBL + CBL            | Constructivist | Indirect Instruction (active, discussion-based + problem-solving)   | Cases + PBL (discussion of cases with multimedia, figures, videos, and models)                                                       |
|                      | DL                   | Behaviorist    | Direct Instruction (passive, information transfer)                  | Lectures                                                                                                                             |
| Ciraj et al., 2010   | CBL                  | Constructivist | Indirect Instruction (active, discussion-based)                     | Cases (4 topic-based blocks of 6 sessions of 2h of group discussion)                                                                 |
|                      | DL                   | Behaviorist    | Direct Instruction (passive, information transfer)                  | Lectures (5 sessions per week of 2h, during 10 weeks)                                                                                |
| Diwan et al., 2017   | CBL                  | Constructivist | Indirect Instruction (active, discussion-based)                     | Cases (2 sessions of 3h each, stepwise discussion of cases + feedback)                                                               |
|                      | Tutorial method      | Constructivist | Interactive Instruction (active, teacher-guided study and practice) | Tutorial Groups                                                                                                                      |
| Fortun et al., 2017  | CBL                  | Constructivist | Indirect Instruction (active, discussion-based)                     | Cases (5 cases: clinical presentation + small-group discussion following stepwise disclosure of cases information)                   |
|                      | Independent readings | Self-directed  | Independent study (active, self-paced learning)                     | Independent readings (5 cases as independent readings)                                                                               |
| Grover et al., 2020  | CBL+ Whatsapp        | Constructivist | Indirect Instruction (active, discussion-based)                     | Cases (2 sessions with guided small-group discussion of tutor by Whatsapp groups)                                                    |
|                      | DL                   | Behaviorist    | Indirect Instruction (active, discussion-based)                     | Lectures (6 sessions)                                                                                                                |
| Hansen et al., 2005  | CBL                  | Constructivist | Indirect Instruction (active, discussion-based)                     | Cases (6 weeks, single student analysis and presentation of cases)                                                                   |
|                      | DL                   | Behaviorist    | Direct Instruction (passive, information transfer)                  | Lectures (6 weeks, single student analysis and presentation of topic)                                                                |
| Hashim et al., 2015  | CBL                  | Constructivist | Indirect Instruction (active, discussion-based)                     | Cases (6 months, small groups)                                                                                                       |
|                      | Tutorial method      | Constructivist | Interactive Instruction (active, teacher-guided study and practice) | Tutorial Groups (6 months)                                                                                                           |
| Hempel et al., 2016  | CBL                  | Constructivist | Indirect Instruction (active, discussion-based)                     | Cases (e-learning program + facilitated discussion of 60 min of 16 ultrasound images and 24 slides in total)                         |
|                      | DL                   | Behaviorist    | Direct Instruction (passive, information transfer)                  | Lectures (9 lectures of 15 min each with 5 min for discussion; lecture objectives covered the same topics as the e-learning program) |

|                     |         |                                        |                                                                                                             |                                                                                                                          |
|---------------------|---------|----------------------------------------|-------------------------------------------------------------------------------------------------------------|--------------------------------------------------------------------------------------------------------------------------|
| Jamkar et al., 2007 | CBL     | Constructivist                         | Indirect Instruction (active, discussion-based)                                                             | Cases (18 cases + demonstration of clinical examination)                                                                 |
|                     | PBL     | Constructivist                         | Indirect Instruction (active, discussion-based + problem-solving)                                           | PBL                                                                                                                      |
| Joshi et al., 2014  | CBL     | Constructivist                         | Indirect Instruction (active, discussion-based)                                                             | Cases (one case + discussion)                                                                                            |
|                     | DL      | Behaviorist                            | Direct Instruction (passive, information transfer)                                                          | Lectures                                                                                                                 |
| Kamat et al., 2012  | CBL     | Constructivist                         | Indirect Instruction (active, discussion-based)                                                             | Cases (two practical sessions + 90 min sessions of cases discussion)                                                     |
|                     | DL      | Behaviorist                            | Direct Instruction (passive, information transfer)                                                          | Lectures (two practical sessions + lectures)                                                                             |
| Kaur et al., 2020   | CBL     | Constructivist                         | Indirect Instruction (active, discussion-based)                                                             | Cases (cases about two topics, 2-hour session; brief explanation + introduction + questions)                             |
|                     | DL      | Behaviorist                            | Direct Instruction (passive, information transfer)                                                          | Lectures (two topics [same as CBL], 2-hour session)                                                                      |
| Latif et al., 2014  | CBL     | Constructivist                         | Indirect Instruction (active, discussion-based)                                                             | Cases (Face-to-face, 2h; PowerPoint Slides + additional slides describing the case; clinical case scenario + discussion) |
|                     | DL      | Behaviorist                            | Direct Instruction (passive, information transfer)                                                          | Lectures (Face-to-face, 2h; same PowerPoint Slides without clinical case)                                                |
| Lee et al., 2013    | CBL     | Constructivist                         | Indirect Instruction (active, discussion-based)                                                             | Cases                                                                                                                    |
|                     | DL      | Behaviorist                            | Direct Instruction (passive, information transfer)                                                          | Lectures                                                                                                                 |
| Ma et al., 2016     | CBL     | Constructivist                         | Indirect Instruction (active, discussion-based)                                                             | Cases (9 weeks of 36h, 35 cases: reading material + discussion + feedback)                                               |
|                     | DL      | Behaviorist                            | Direct Instruction (passive, information transfer)                                                          | Lectures (9 weeks of 36h, reading materials and lectures without discussion)                                             |
| Maas et al., 2018   | TBL+CBL | Constructivist + Social constructivist | Interactive Instruction (active + collaborative learning) + Indirect Instruction (active, discussion-based) | Cases + TBL (6 sessions totaling 2.5h; pre-recorded lectures + 2h of discussion of cases)                                |

|                          |                             |                              |                                                                                                                          |                                                                                   |
|--------------------------|-----------------------------|------------------------------|--------------------------------------------------------------------------------------------------------------------------|-----------------------------------------------------------------------------------|
|                          | DL                          | Behaviorist                  | Direct Instruction (passive, information transfer)                                                                       | Lectures (5h in 2 consecutive days)                                               |
| Montaldo et al., 2013    | CBL                         | Constructivist               | Indirect Instruction (active, discussion-based)                                                                          | Cases (108h classes + 380h tutorial teaching + 36 seminars of 2h during 6 months) |
|                          | DL + Tutorial with patients | Behaviorist + Constructivist | Direct Instruction (passive, information transfer) + Interactive Instruction (active, teacher-guided study and practice) | Lectures (108h) + tutorial teaching (450h)                                        |
| Nagaiah et al., 2014     | CBL                         | Constructivist               | Indirect Instruction (active, discussion-based)                                                                          | Cases (two topics, traditional classes were reinforced by discussion of 6 cases)  |
|                          | DL                          | Behaviorist                  | Direct Instruction (passive, information transfer)                                                                       | Lectures (same two topics)                                                        |
| Nair et al., 2013        | CBL                         | Constructivist               | Indirect Instruction (active, discussion-based)                                                                          | Cases (one case: presentation + learning objective + discussion of the case)      |
|                          | DL                          | Behaviorist                  | Direct Instruction (passive, information transfer)                                                                       | Lectures (one lecture)                                                            |
| Nordquist et al., 2012   | CBL                         | Constructivist               | Indirect Instruction (active, discussion-based)                                                                          | Cases                                                                             |
|                          | DL                          | Behaviorist                  | Direct Instruction (passive, information transfer)                                                                       | Lectures                                                                          |
| Palappallil et al., 2019 | CBL                         | Constructivist               | Indirect Instruction (active, discussion-based)                                                                          | Cases (6 sessions of 40 min, role-play + discussion)                              |
|                          | TBL                         | Social constructivist        | Interactive Instruction (active + collaborative learning)                                                                | TBL (6 sessions of 90 min, discussion)                                            |
|                          | DL                          | Behaviorist                  | Direct Instruction (passive, information transfer)                                                                       | Lectures (6 sessions of 30 min; PowerPoint-aided sessions)                        |
| Panja et al., 2013       | CBL                         | Constructivist               | Indirect Instruction (active, discussion-based)                                                                          | Cases (one semester, discussion of clinical cases)                                |
|                          | Tutorial method             | Constructivist               | Interactive Instruction (active, teacher-guided study and practice)                                                      | Tutorial Groups (one semester)                                                    |
| Patil et al., 2016       | CBL                         | Constructivist               | Indirect Instruction (active, discussion-based)                                                                          | Cases (2 sessions of 2h, presentation and discussion of case)                     |

|                         | Tutorial method | Constructivist        | Interactive Instruction (active, teacher-guided study and practice)                                   | Tutorial groups (2 sessions of 2h)                                                                                                     |
|-------------------------|-----------------|-----------------------|-------------------------------------------------------------------------------------------------------|----------------------------------------------------------------------------------------------------------------------------------------|
| Rajan et al., 2016      | CBL             | Constructivist        | Indirect Instruction (active, discussion-based)                                                       | Cases (cases discussions)                                                                                                              |
|                         | DL              | Behaviorist           | Direct Instruction (passive, information transfer)                                                    | Lectures                                                                                                                               |
| Schwartz et al., 2007   | CBL             | Constructivist        | Indirect Instruction (active, discussion-based)                                                       | Cases (1h, introduction + learning objectives + discussion of case + feedback)                                                         |
|                         | HPS             | Experiential learning | Experiential Learning (active, hands-on experience)                                                   | Simulation with high-fidelity mannequins (1h, orientation + learning objectives + discussion + hands-on with the mannequin + feedback) |
| Sudhakar et al., 2017   | CBL             | Constructivist        | Indirect Instruction (active, discussion-based)                                                       | Cases                                                                                                                                  |
|                         | DL              | Behaviorist           | Direct Instruction (passive, information transfer)                                                    | Lectures                                                                                                                               |
| Surapaneni et al., 2010 | CBL             | Constructivist        | Indirect Instruction (active, discussion-based)                                                       | Cases (5 cases, discussion of cases)                                                                                                   |
|                         | DL              | Behaviorist           | Direct Instruction (passive, information transfer)                                                    | Lectures                                                                                                                               |
| Tathe et al., 2014      | CBL             | Constructivist        | Indirect Instruction (active, discussion-based)                                                       | Cases (case + faculty learner interaction + routine lecture + faculty learner interaction on resolution of the case)                   |
|                         | DL              | Behaviorist           | Direct Instruction (passive, information transfer)                                                    | Lectures                                                                                                                               |
| Turk et al., 2019       | CBL             | Constructivist        | Indirect Instruction (active, discussion-based) + Experiential Learning (active, hands-on experience) | Cases (blended learning: textbooks + interactive e-cases with feedback + simulated patient contact using role-playing with actors)     |
| Vedi et al., 2021       | CBL             | Constructivist        | Indirect Instruction (active, discussion-based)                                                       | Cases (e-learning; 2-4 sessions via google group + discussion of cases)                                                                |
|                         | DL              | Behaviorist           | Direct Instruction (passive, information transfer)                                                    | Lectures                                                                                                                               |
| Vora et al., 2015       | CBL             | Constructivist        | Indirect Instruction (active, discussion-based)                                                       | Cases (2 cases; 2 sessions of 2h, stepwise disclosure of cases + discussion)                                                           |

|                      |           |                |                                                                   |                                                                                                                                                   |
|----------------------|-----------|----------------|-------------------------------------------------------------------|---------------------------------------------------------------------------------------------------------------------------------------------------|
|                      | DL        | Behaviorist    | Direct Instruction (passive, information transfer)                | Lectures (1h lecture + 2 cases where students revise the cases on their own without any guidance)                                                 |
| Waliany et al., 2019 | CBL       | Constructivist | Indirect Instruction (active, discussion-based)                   | Cases (6-7 sessions of 1h; presentation + interpretation of reported history, physical exam and diagnostic data + discussion of cases + feedback) |
| Willis et al., 2020  | CBL       | Constructivist | Indirect Instruction (active, discussion-based)                   | Cases (21 cases resolved within online platform)                                                                                                  |
| Yang et al., 2021    | FC + CBL  | Constructivist | Indirect Instruction (active, discussion-based)                   | Cases (pre-class notes + in-class introduction + discussion)                                                                                      |
|                      | DL        | Behaviorist    | Direct Instruction (passive, information transfer)                | Lectures (4h)                                                                                                                                     |
| Zhao et al., 2020    | PBL + CBL | Constructivist | Indirect Instruction (active, discussion-based + problem-solving) | PBL + Cases (pre-recorded video materials + introduction + discussion of cases)                                                                   |
|                      | DL        | Behaviorist    | Direct Instruction (passive, information transfer)                | Lectures + textbook                                                                                                                               |

\* Although some teaching methodologies may fit under more than one model, we are reporting the main pedagogical model being used.

† Some studies do not provide description of structure of teaching method and thus do not display further explanation within parenthesis.
