# Supplementary material
Source: MDPI journal article supplement (https://www.mdpi.com/2227-7102/13/3/238)

**Figure S2** – Funnels plots of included meta-analyses.

**Figure S2.1** – Funnel plot for exam scores outcome.

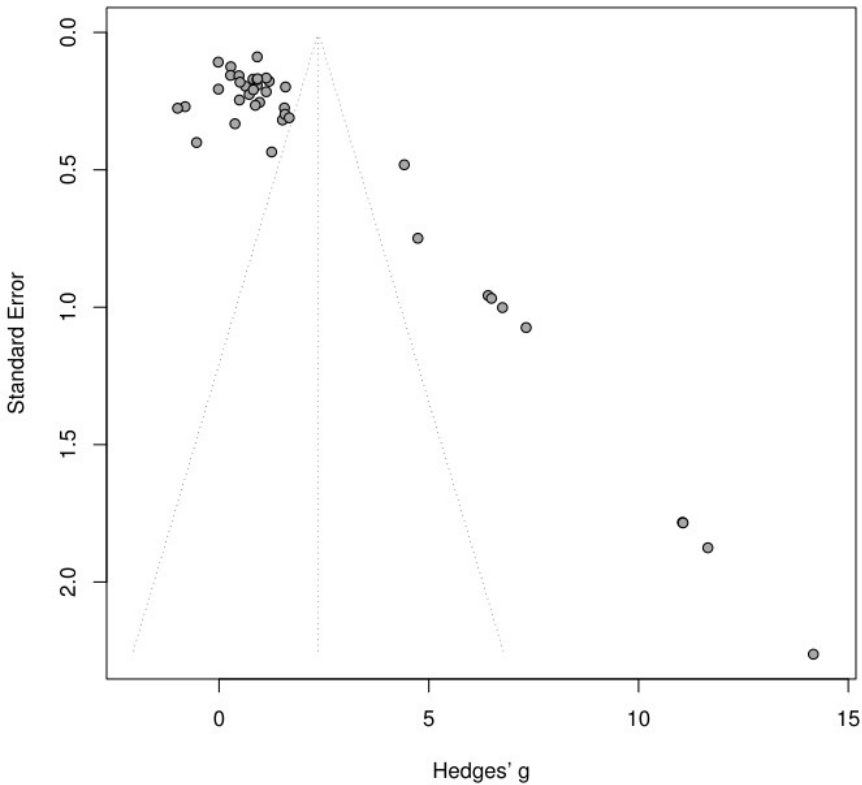

**Figure S2.2** Trim-and-fill funnel plot for exam scores outcome.

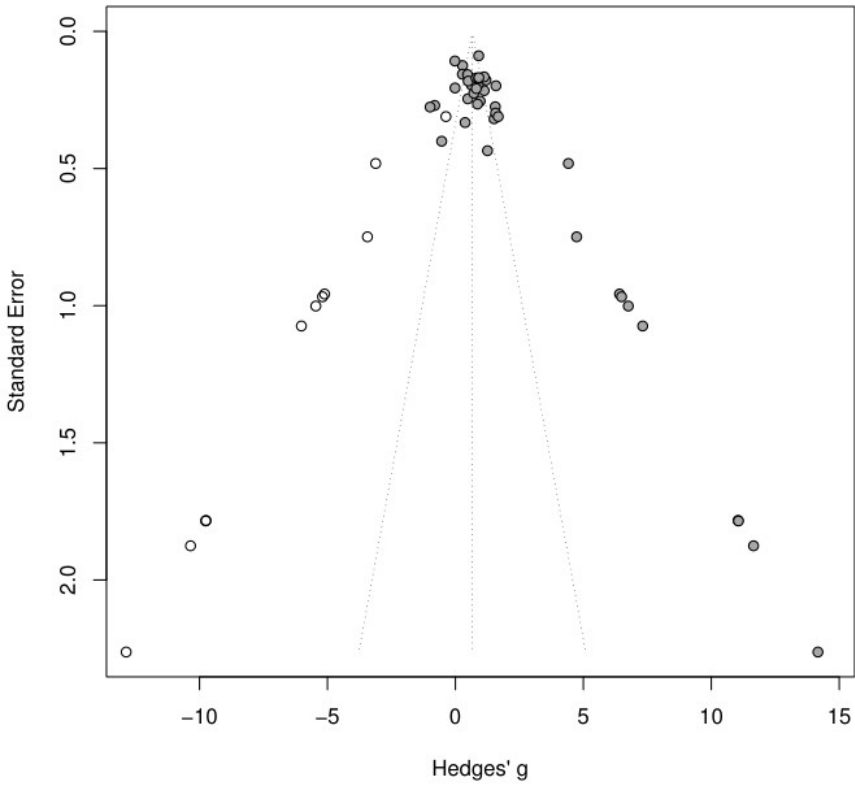

Supplement: s1 [file s1]
