# Supplementary material
Source: MDPI journal article supplement (https://www.mdpi.com/2227-7102/13/3/238)

**Figure S1** – Forest plots of included meta-analyses.

**Figure S1.1** – Forest plot comparing exam scores between CBL and other teaching methodologies.

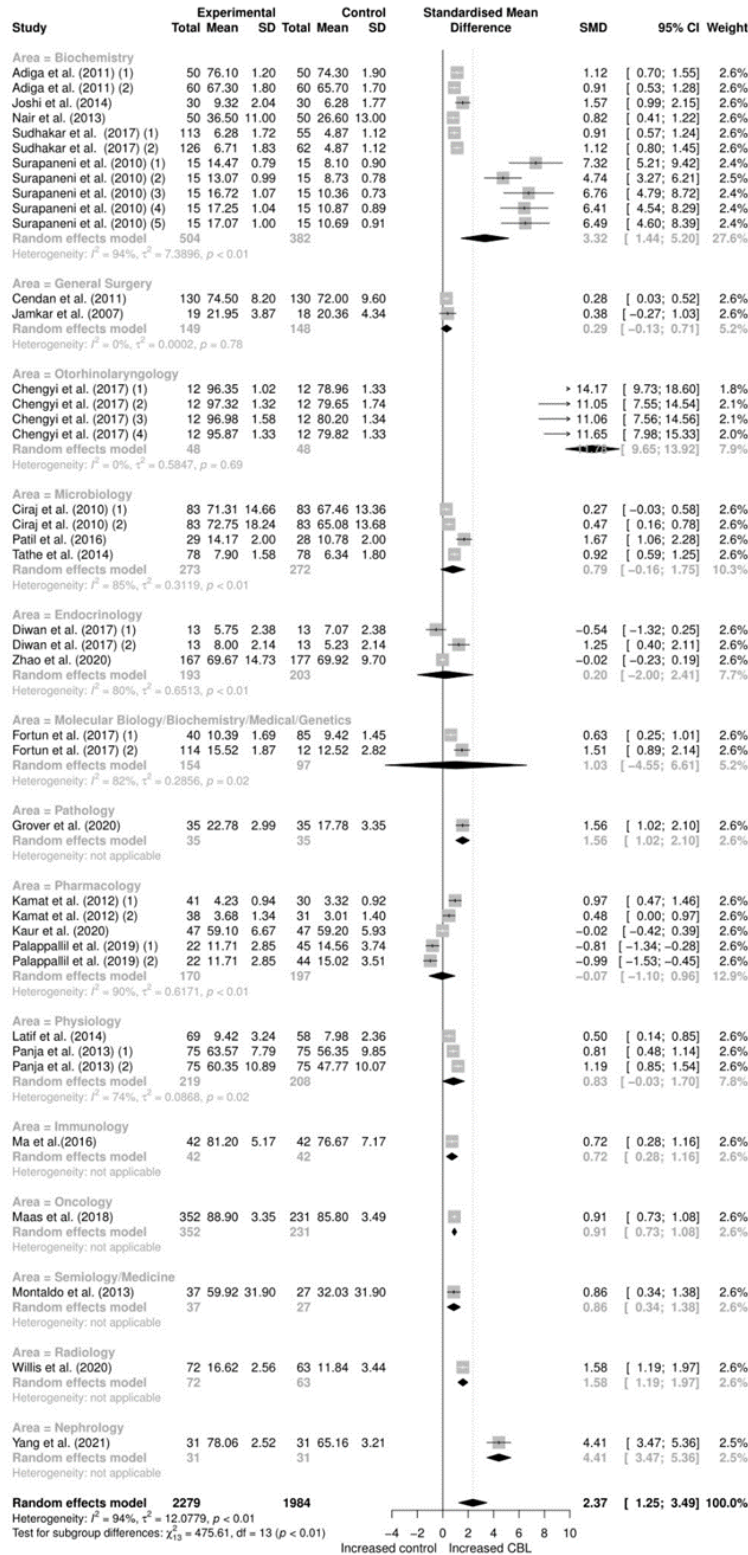

**Figure S1.2** – Forest plot comparing OSCE (objective structured clinical examination) score between CBL and other teaching methodologies.

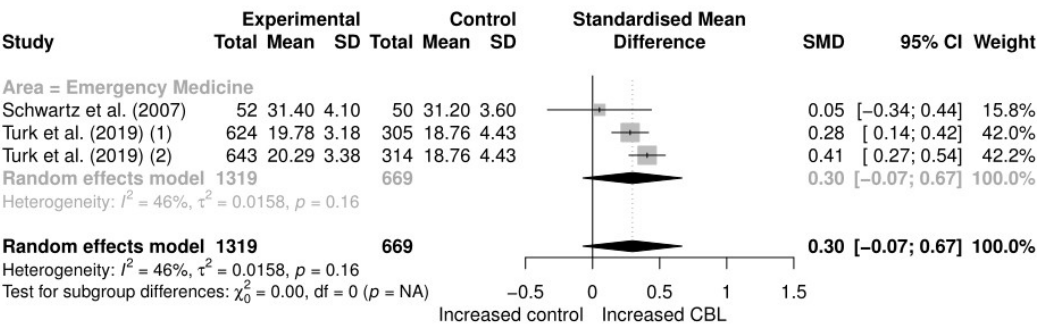

**Figure S1.3** – Forest plot comparing self-learning between CBL and other teaching methodologies.

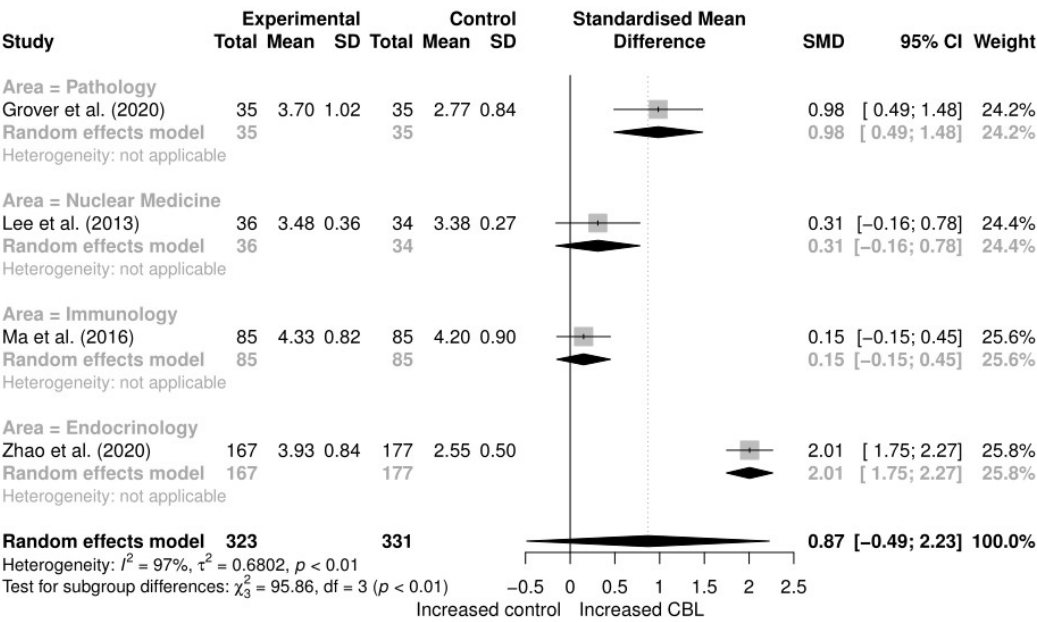

**Figure S1.4** – Forest plot comparing critical thinking between CBL and other teaching methodologies.

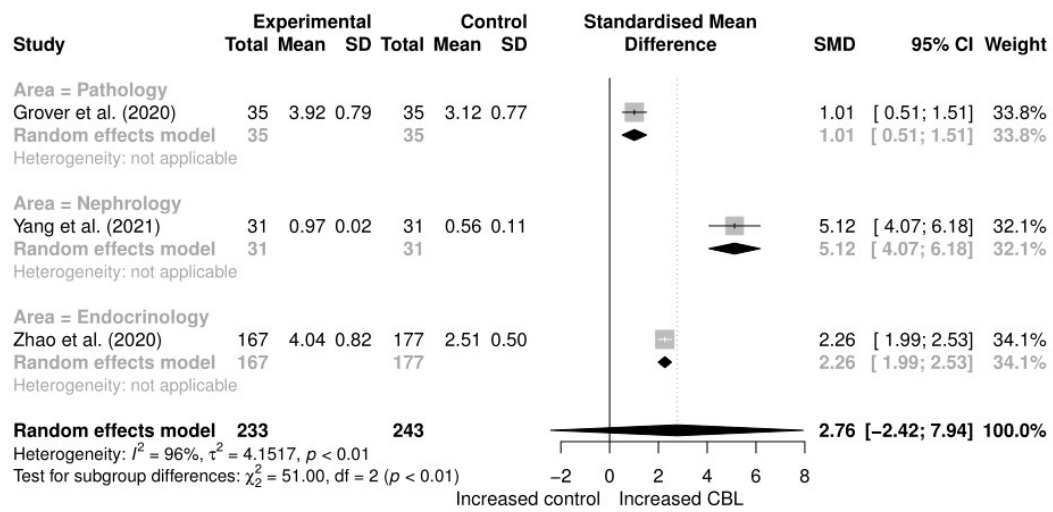

**Figure S1.5** – Forest plot comparing satisfaction with teaching method between CBL and other teaching methodologies.

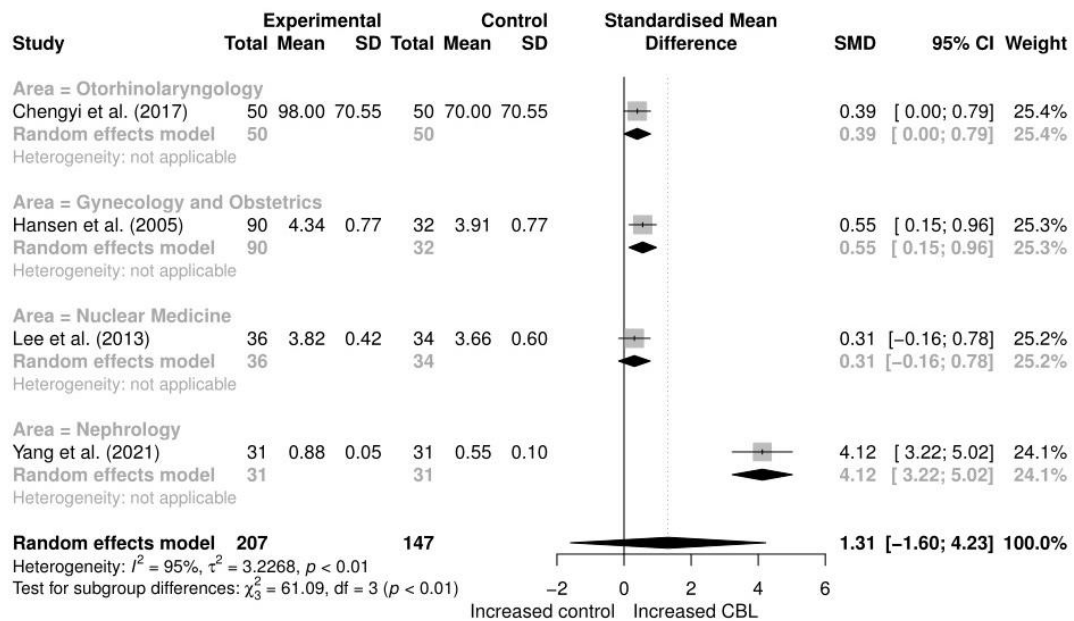

**Figure S1.6** – Forest plot comparing time allotted for classes between CBL and other teaching methodologies.

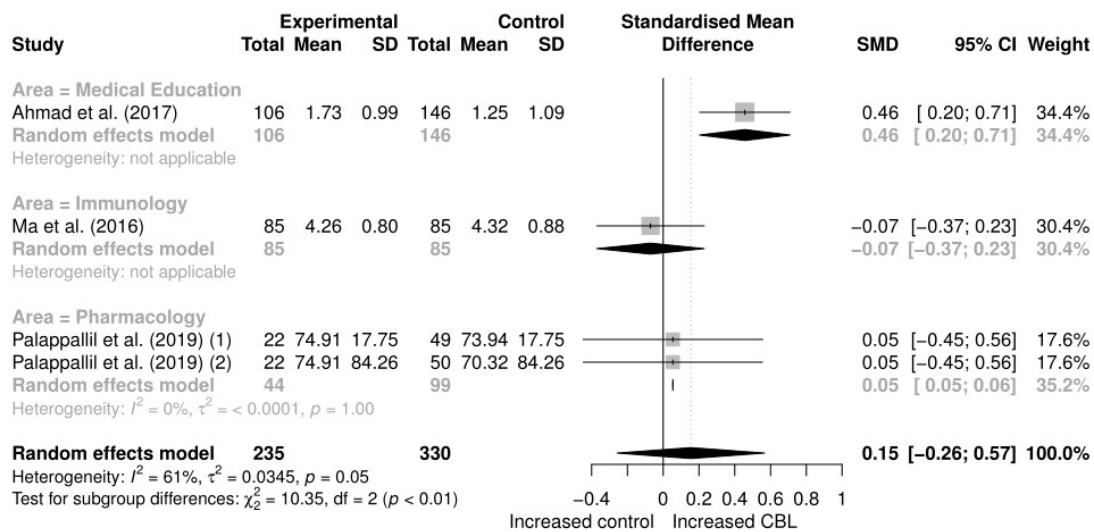

**Figure S1.7** – Forest plot comparing interest and motivation between CBL and other teaching methodologies.

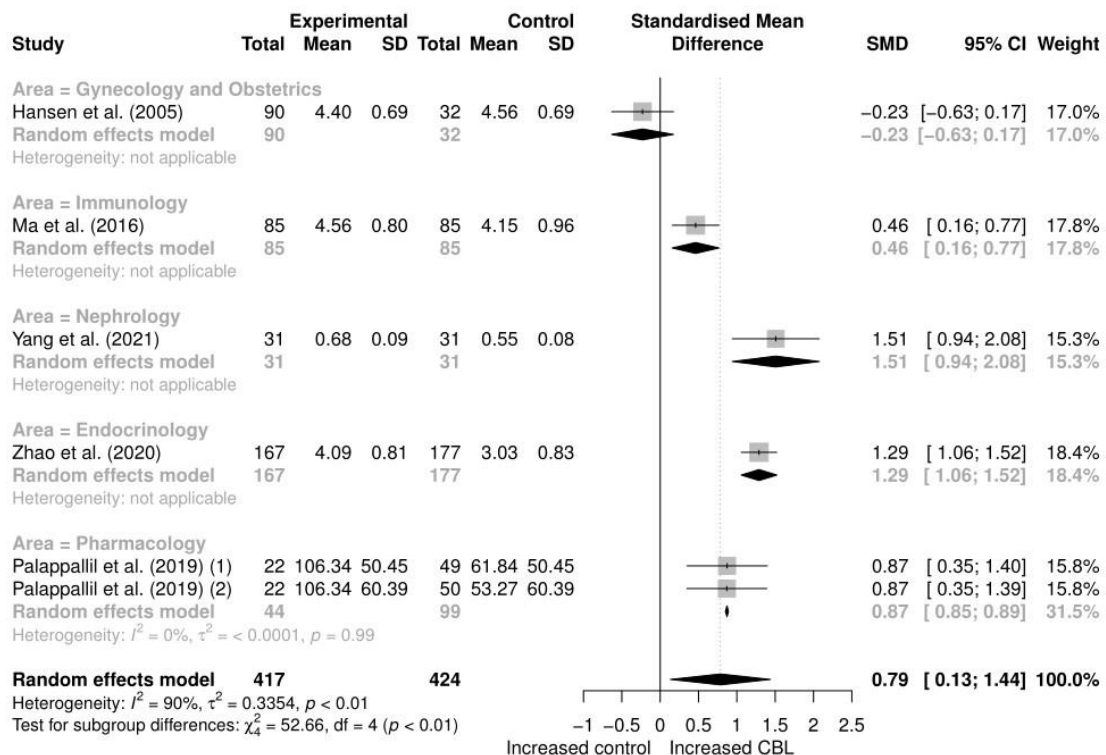

**Figure S1.8** – Forest plot comparing inter-peer interaction in teamwork between CBL and other teaching methodologies.

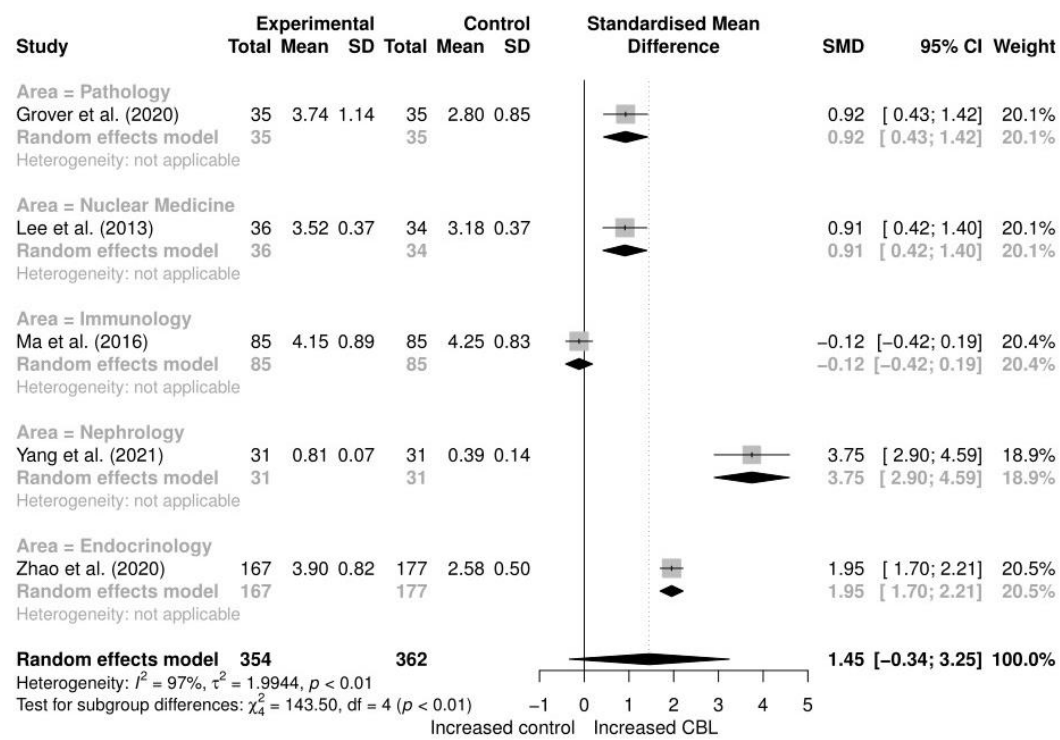

Supplement: s1 [file s1]
