# Supplementary material
Source: MDPI journal article supplement (https://www.mdpi.com/2227-7102/13/3/238)
Supplement: s1 [file s1]

**Table S5** – Sensitivity analyses for each eligible outcome.

| Outcome measure | Main findings |                          |                     | Sensitivity analysis |                          |                     |                                                                                                                                                                                                                                                                                                                                                                                                                                                                                                                                                                                                                                                                                             |
|-----------------|---------------|--------------------------|---------------------|----------------------|--------------------------|---------------------|---------------------------------------------------------------------------------------------------------------------------------------------------------------------------------------------------------------------------------------------------------------------------------------------------------------------------------------------------------------------------------------------------------------------------------------------------------------------------------------------------------------------------------------------------------------------------------------------------------------------------------------------------------------------------------------------|
|                 | k, n          | I <sup>2</sup> , P value | SMD (CI 95%)        | k, n                 | I <sup>2</sup> , P value | SMD (CI 95%)        | Excluded studies (reasons)                                                                                                                                                                                                                                                                                                                                                                                                                                                                                                                                                                                                                                                                  |
| Exam scores     | 40, 4263      | 94%, p<0.001             | 2.37 (1.25 to 3.49) | 29, 3301             | 95%, p<0.001             | 3.06 (1.54 to 4.58) | <i>Control group (CBL vs DL)</i> : Diwan et al. (2017); Panja et al. (2013) (1, 2); Patil et al. (2016) [Tutorial method]; Fortun et al. (2017) [Independent lectures]; Montaldo et al. (2013) [DL + Tutorial with patients]; Willis et al. (2020) [unspecified]; Palappallil et al. (2019) (2) [TBL]; Jamkar et al. (2007) [PBL]                                                                                                                                                                                                                                                                                                                                                           |
|                 |               |                          |                     | 6, 473               | 78%, p<0.001             | 0.90 (0.14 to 1.66) | <i>Control group (CBL vs Tutorial method)</i> : Adiga et al. (2011) (1, 2); Cendan et al. (2011); Chengyi et al. (2017) (1, 2, 3, 4); Ciraj et al. (2010) (1, 2); Grover et al. (2020); Joshi et al. (2014); Kamat et al. (2012) (1,2); Kaur et al. (2020); Latif et al. (2014); Ma et al. (2016); Maas et al. (2018); Nair et al. (2013); Palappallil et al. (2019) (2); Sudhakar et al. (2017) (1, 2); Surapaneni et al. (2010) (1, 2, 3, 4, 5); Tathe et al. (2014); Yang et al. (2021); Zhao et al. (2020) [Didactic lectures]; Fortun et al. (2017) (1, 2) [Independent readings]; Jamkar et al. (2007) [PBL]; Palappallil et al. (2019) (1) [TBL]; Willis et al. (2020) [unspecified] |
|                 |               |                          |                     | 31, 2973             | 91%, p<0.001             | 1.44 (0.67 to 2.21) | <i>Experimental group</i> : Chengyi et al. (2017) [CBL+PBL]; Maas et al. (2018) [TB+CBL]; Grover et al. (2020) [CBL+whatsapp]; Willis et al. (2020) [CBL]; Yang et al. (2021) [CBL + FC]; Zhao et al. (2020) [CBL+PBL]                                                                                                                                                                                                                                                                                                                                                                                                                                                                      |
|                 |               |                          |                     | 29, 2971             | 95%, p<0.001             | 3.07 (1.55 to 4.60) | <i>Type of study: (crossover)</i> : Adiga et al. (2011); Cendan et al. (2011); Diwan et al. (2017); Grover et al. (2020); Kaur et al. (2020); Ma et al. (2016); Sudhakar et al. (2017); Tathe et al. (2014)                                                                                                                                                                                                                                                                                                                                                                                                                                                                                 |
|                 |               |                          |                     | 31, 3439             | 95%, p<0.001             | 1.99 (0.95 to 3.04) | <i>Without global academic performance</i> : Kamat et al. (2012); Ciraj et al. (2010); Sudakar et al. (2017); Chengyi et al. (2017)                                                                                                                                                                                                                                                                                                                                                                                                                                                                                                                                                         |

|                                            |        |                        |                            |          |                        |                            |                                                                                                                                                                                                                                                                                                                                                                                                                                     |
|--------------------------------------------|--------|------------------------|----------------------------|----------|------------------------|----------------------------|-------------------------------------------------------------------------------------------------------------------------------------------------------------------------------------------------------------------------------------------------------------------------------------------------------------------------------------------------------------------------------------------------------------------------------------|
|                                            |        |                        |                            | 15, 1591 | 39%, p=0.06            | <b>1.16 (0.99 to 1.32)</b> | <i>Outliers:</i> Surapaneni et al. (2010) (1, 2, 3, 4, 5); Cendan et al. (2011); Jamkar et al. (2007); Chengyi et al. (2017) (1, 2, 3, 4); Ciraj et al. (2010) (1, 2); Diwan et al. (2017) (1); Zhao et al. (2020); Fortun et al. (2017) (2); Kamat et al. (2012) (2); Kaur et al. (2020); Palappallil et al. (2019) (1, 2); Latif et al. (2014); Panja et al. (2013) (1); Ma et al. (2016); Maas et al. (2018); Yang et al. (2021) |
| <b>Self-learning</b>                       | 4, 654 | <b>97%, p&lt;0.001</b> | 0.87 (-0.49 to 2.23)       | 2, 240   | 0%, p=0.58             | 0.20 (-0.73 to 1.12)       | <i>Experimental group:</i> Grover et al. (2020) [CBL+ Whatsapp]; Zhao et al. (2020) [CBL + PBL]                                                                                                                                                                                                                                                                                                                                     |
|                                            |        |                        |                            | 2, 414   | <b>97%, p&lt;0.001</b> | 1.17 (-9.61 to 11.95)      | <i>Type of study (crossover):</i> Ma et al. (2016); Grover et al. (2020)                                                                                                                                                                                                                                                                                                                                                            |
| <b>Critical thinking</b>                   | 5, 390 | <b>85%, p&lt;0.001</b> | 0.96 (-0.33 to 2.26)       | 3, 476   | <b>96%, p&lt;0.001</b> | 2.76 (-2.43 to 7.94)       | <i>Control group (CBL vs DL):</i> Yang et al. (2021) [CBL + FC]; Chengyi et al. (2017) [CBL + PBL]                                                                                                                                                                                                                                                                                                                                  |
| <b>Time allotted for classes</b>           | 4, 565 | 61%, p=0.05            | 0.15 (-0.26 to 0.57)       | 3, 493   | <b>73%, p=0.03</b>     | 0.17 (-0.56 to 0.90)       | <i>Control group (CBL vs DL):</i> Palappallil et al. (2019) (2) [TBL]                                                                                                                                                                                                                                                                                                                                                               |
|                                            |        |                        |                            | 3, 395   | 39%, p=0.20            | 0.26 (-0.35 to 0.87)       | <i>Type of study (crossover):</i> Ma et al. (2016)                                                                                                                                                                                                                                                                                                                                                                                  |
| <b>Interest and motivation</b>             | 6, 841 | <b>90%, p&lt;0.001</b> | <b>0.79 (0.13 to 1.44)</b> | 3, 363   | <b>84%, p=0.002</b>    | 0.36 (-1.01 to 1.72)       | <i>Experimental group:</i> Yang et al. (2021) [CBL + FC]; Zhao et al. (2020) [CBL+PBL]; Palappadi et al. (2) [TBL]                                                                                                                                                                                                                                                                                                                  |
|                                            |        |                        |                            | 4, 549   | 37%, p=0.19            | <b>1.16 (0.69 to 1.62)</b> | <i>Type of study (crossover):</i> Ma et al. (2016); Hansen et al. (2005)                                                                                                                                                                                                                                                                                                                                                            |
|                                            |        |                        |                            | 5, 769   | <b>93%, p&lt;0.001</b> | 0.77 (-0.09 to 1.63)       | <i>Control group (CBL vs DL):</i> Palappadi et al. (2) [TBL]                                                                                                                                                                                                                                                                                                                                                                        |
| <b>Inter-peer interaction in team work</b> | 5, 716 | <b>96%, p&lt;0.001</b> | 1.45 (-0.34 to 3.25)       | 2, 240   | <b>92%, p=0.005</b>    | 0.38 (-6.13 to 6.88)       | <i>Experimental group:</i> Grover et al. (2020) [CBL + Whatsapp]; Hashim et al. (2015) [CBL + Whatsapp]; Yang et al. (2021) [CBL + FC]; Zhao et al. [PBL + CBL]                                                                                                                                                                                                                                                                     |
|                                            |        |                        |                            | 3, 476   | <b>94%, p&lt;0.001</b> | 2.17 (-1.35 to 5.69)       | <i>Type of study (crossover):</i> Ma et al. (2016); Grover et al. (2020)                                                                                                                                                                                                                                                                                                                                                            |

**Legend:** OSCE – objective structured clinical examination score; k – number of comparisons (each study corresponds to more than one comparison when (i) exists more than 3 groups of intervention or (ii) one group has more than one evaluation group with overlapping); n – total number of individuals analyzed in each group study; I<sup>2</sup> – heterogeneity; SMD – standardized mean difference values; CI – 95% confidence interval at 95%.

**Bold values** – statistically significant values.
