# Supplementary material
Source: MDPI journal article supplement (https://www.mdpi.com/2227-7102/13/3/238)
Supplement: s1 [file s1]

**Table S1** - Database search strategy for each database included.

| Database              | Results     | Search strategy                                                                                                                                                                                                                                                                                                                                                                                                                                                                                                                                                                                      | Date       |
|-----------------------|-------------|------------------------------------------------------------------------------------------------------------------------------------------------------------------------------------------------------------------------------------------------------------------------------------------------------------------------------------------------------------------------------------------------------------------------------------------------------------------------------------------------------------------------------------------------------------------------------------------------------|------------|
| <b>PubMed</b>         | 1235        | ("Case-Based Learning" OR iCBLS OR "clinical cases" OR "case-based teaching" OR "case-based education" OR "case-based studies" OR "case-based study" OR "Case Based Learning" OR "case based teaching" OR "case based education" OR "case based studies" OR "case based study") AND ("Medical Education" OR "Medical School" OR "medical student" OR "medicine student" OR "Prehospital Education" OR "Health Science Education" OR "Medical Curriculum")                                                                                                                                            | 28/04/2021 |
| <b>EMBASE</b>         | 2181        | ('case-based learning' OR icbls OR 'clinical cases' OR 'case-based teaching' OR 'case-based education' OR 'case-based studies' OR 'case-based study' OR 'case based learning'/exp OR 'case based learning' OR 'case based teaching' OR 'case based education' OR 'case based studies' OR 'case based study') AND ('medical education'/exp OR 'medical education' OR 'medical school'/exp OR 'medical school' OR 'medical student'/exp OR 'medical student' OR 'medicine student' OR 'prehospital education' OR 'health science education'/exp OR 'health science education' OR 'medical curriculum') | 28/04/2021 |
| <b>Web of Science</b> | 696         | ("Case-Based Learning" OR iCBLS OR "clinical cases" OR "case-based teaching" OR "case-based education" OR "case-based studies" OR "case-based study" OR "Case Based Learning" OR "case based teaching" OR "case based education" OR "case based studies" OR "case based study") AND ("Medical Education" OR "Medical School" OR "medical student" OR "medicine student" OR "Prehospital Education" OR "Health Science Education" OR "Medical Curriculum")                                                                                                                                            | 28/04/2021 |
| <b>Total</b>          | <b>4412</b> |                                                                                                                                                                                                                                                                                                                                                                                                                                                                                                                                                                                                      |            |
