# Supplementary material
Source: MDPI journal article supplement (https://www.mdpi.com/2227-7102/13/3/238)
Supplement: s1 [file s1]

**Table S4** – Scoping summary of outcome measures.

| Outcome measures                                                                        | Number of studies | % studies           |
|-----------------------------------------------------------------------------------------|-------------------|---------------------|
| <b><u>ACADEMIC PERFORMANCE</u></b>                                                      | <b><u>33</u></b>  | <b><u>80.4%</u></b> |
| Exam scores                                                                             | 30                | 90.9%               |
| Objective structured clinical examination score (OSCE)                                  | 3                 | 9.1%                |
| Number of students with correct answers                                                 | 1                 | 3.0%                |
| Mean difference in test evaluation scores                                               | 1                 | 3.0%                |
| Summative of perception scores                                                          | 1                 | 3.0%                |
| Critical thinking-based scores                                                          | 1                 | 3.0%                |
| <b><u>PERCEPTIONS</u></b>                                                               | <b><u>15</u></b>  | <b><u>36.6%</u></b> |
| <b>INDIVIDUAL PERCEPTIONS</b>                                                           | <b>13</b>         | <b>86.7%</b>        |
| Understanding and knowledge absorption                                                  | 6                 | 46.2%               |
| Critical thinking                                                                       | 5                 | 38.5%               |
| Clinical decision making                                                                | 5                 | 38.5%               |
| Interest and motivation                                                                 | 5                 | 38.5%               |
| Learning experience                                                                     | 5                 | 38.5%               |
| Satisfaction with teaching method                                                       | 4                 | 30.8%               |
| Self-learning                                                                           | 4                 | 30.8%               |
| Time allotted for classes                                                               | 4                 | 30.8%               |
| Perceptions for exams                                                                   | 4                 | 30.8%               |
| Learning effectiveness                                                                  | 3                 | 23.1%               |
| Lack of time available for personal activities                                          | 2                 | 15.4%               |
| Financial notions in medical acts                                                       | 2                 | 15.4%               |
| Forced postponement of marriage or engagement                                           | 1                 | 7.7%                |
| Conflict with parents over career decision                                              | 1                 | 7.7%                |
| Concern about treatment grades awarded                                                  | 1                 | 7.7%                |
| Transition from preclinical to clinical years                                           | 1                 | 7.7%                |
| Responsibilities for comprehensive patient care                                         | 1                 | 7.7%                |
| How doctors work with patient cases step by step in a longitudinal primary care setting | 1                 | 7.7%                |

|                                                                        |          |              |
|------------------------------------------------------------------------|----------|--------------|
| Expectation of medical school and what reality it is like              | 1        | 7.7%         |
| Self-evaluation                                                        | 1        | 7.7%         |
| Communication skills                                                   | 1        | 7.7%         |
| Understand how to share information with patients                      | 1        | 7.7%         |
| Too much pressure in classroom                                         | 1        | 7.7%         |
| The sessions increased academic burden to some extent                  | 1        | 7.7%         |
| Observation score of student behavior                                  | 1        | 7.7%         |
| <b>INTER-PEER PERCEPTIONS</b>                                          | <b>6</b> | <b>40.0%</b> |
| Inter-peer interaction in team work                                    | 6        | 100%         |
| <b>STUDENT-FACULTY PERCEPTIONS</b>                                     | <b>8</b> | <b>53.3%</b> |
| Student-teacher perceptions                                            | 7        | 87.5%        |
| Inconsistency of feedback on work between different teachers           | 1        | 12.5%        |
| Conflict with teacher or supervisor on personal matters                | 1        | 12.5%        |
| Unfairness in teacher or staff distribution in some classes or clinics | 1        | 12.5%        |
| Questions asked by students                                            | 1        | 12.5%        |
| Learning process                                                       | 1        | 12.5%        |
| Instructional aids                                                     | 1        | 12.5%        |
| <b>OTHER PERCEPTIONS</b>                                               | <b>5</b> | <b>33.3%</b> |
| Attendance                                                             | 2        | 40.0%        |
| Rules and regulations of the school                                    | 1        | 20.0%        |
| Amount of cheating in medical school                                   | 1        | 20.0%        |
| Teaching methods will be welcome in curriculum changes                 | 1        | 20.0%        |
| Popularization                                                         | 1        | 20.0%        |
